# Supplementary material for: High-Intensity Focused Ultrasound (HIFU) Modeling:In Vitro Validation and Integration into Patient-Specific Planning Tool
Source: Research Square preprint supplement (doi:10.21203/rs.3.rs-7427702/v1), 2025-09-05
Supplement: Supplementary file 1 [file 00aca78d7cb418bf252a4178.xlsx]

## Sheet: Sheet1
D1 experimental measuraments									D1 simulation measuraments
Condition	Material	Shot #	Measurement 1	Measurement 2	Measurement 3	Measurement 4	Measurement 5		Condition	Material	Measurement
60% - 45 s	PA	1	18.35	17.75	17.92	17.7	17.52		60% - 45 s	PA	15
60% - 45 s	PA	2	13.77	14.03	14.09	13.6	14.16		60% - 45 s	PA+PVA	15
60% - 45 s	PA	3	13.05	13.16	13.12	12.14	12.17		60% - 45 s	PA+AGAR	16.5
60% - 45 s	PA+PVA	1	12.21	12.69	12.46	12.7	12.62		65% - 30 s	PA	14.7
60% - 45 s	PA+PVA	2	12.11	11.98	11.64	11.84	12.04		65% - 30 s	PA+PVA	14.4
60% - 45 s	PA+PVA	3	No Lesion	No Lesion	No Lesion	No Lesion	No Lesion		65% - 30 s	PA+AGAR	16.2
60% - 45 s	PA+AGAR	1	19.09	19.04	18.6	18.63	19.11		70% - 10 s	PA	11.1
60% - 45 s	PA+AGAR	2	19.37	19.96	19.6	19.69	19.35		70% - 10 s	PA+PVA	11
60% - 45 s	PA+AGAR	3	18.07	18.32	18.05	17.85	18.22		70% - 10 s	PA+AGAR	11.3
65% - 30 s	PA	1	16.31	16.63	16.42	16.06	16.35
65% - 30 s	PA	2	9.42	8.93	9.07	8.97	9.27
65% - 30 s	PA	3	18.41	18.23	19.04	18.86	18.95
65% - 30 s	PA+PVA	1	15.93	15.61	16.16	16.2	15.52
65% - 30 s	PA+PVA	2	14.99	15.07	15.2	15.28	15.07
65% - 30 s	PA+PVA	3	13.52	13.66	13.18	13.41	13.11
65% - 30 s	PA+AGAR	1	21.69	22.3	22.49	22.34	22.11
65% - 30 s	PA+AGAR	2	18.51	18.49	19.25	18.85	18.57
65% - 30 s	PA+AGAR	3	14.7	15.14	14.74	14.63	15.1
70% - 10 s	PA	1	9.41	9.24	8.4	8.66	9.15
70% - 10 s	PA	2	13.18	13.4	13.48	13.46	12.85
70% - 10 s	PA	3	10.74	10.85	9.93	10.33	10.34
70% - 10 s	PA+PVA	1	9.3	9.08	9.55	9.23	9.15
70% - 10 s	PA+PVA	2	16.66	16.56	16.5	16.62	16.59
70% - 10 s	PA+PVA	3	11.81	11.66	11.56	11.42	11.43
70% - 10 s	PA+AGAR	1	4.71	4.69	4.96	4.82	4.62
70% - 10 s	PA+AGAR	2	8.81	8.41	8.65	9.1	8.44
70% - 10 s	PA+AGAR	3	10.69	11.1	10.6	11.07	10.61
D2 experimental measuraments									D2 simulation measuraments
Condition	Material	Shot #	Measurement 1	Measurement 2	Measurement 3	Measurement 4	Measurement 5		Condition	Material	Measurement
60% - 45 s	PA	1	2.86	2.82	2.77	3.08	2.93		60% - 45 s	PA	4.5
60% - 45 s	PA	2	4.25	4.31	4.56	4.36	4.53		60% - 45 s	PA+PVA	4.5
60% - 45 s	PA	3	5.97	6.07	6.32	6.26	6.3		60% - 45 s	PA+AGAR	5.1
60% - 45 s	PA+PVA	1	5.4	5.41	5.41	4.67	5.05		65% - 30 s	PA	4.5
60% - 45 s	PA+PVA	2	4.09	4.76	4.04	4.04	4.2		65% - 30 s	PA+PVA	4.1
60% - 45 s	PA+PVA	3	No Lesion	No Lesion	No Lesion	No Lesion	No Lesion		65% - 30 s	PA+AGAR	4.5
60% - 45 s	PA+AGAR	1	5.94	5.85	5.98	6.27	5.76		70% - 10 s	PA	2.7
60% - 45 s	PA+AGAR	2	5.52	5.09	5.04	5.51	5.08		70% - 10 s	PA+PVA	2.2
60% - 45 s	PA+AGAR	3	4.64	4.52	4.23	4.23	4.21		70% - 10 s	PA+AGAR	2.75
65% - 30 s	PA	1	5.07	4.86	5.02	5.13	5.39
65% - 30 s	PA	2	4.62	4.6	4.5	4.71	4.62
65% - 30 s	PA	3	4.56	4.84	4.72	4.71	4.63
65% - 30 s	PA+PVA	1	8.26	8.1	8.54	8.26	8.15
65% - 30 s	PA+PVA	2	8.39	8.24	8.25	8.28	8.28
65% - 30 s	PA+PVA	3	7.79	7.59	7.41	7.37	7.85
65% - 30 s	PA+AGAR	1	6.6	7.07	7.19	6.94	6.9
65% - 30 s	PA+AGAR	2	5.01	5.38	5.4	5.21	5.06
65% - 30 s	PA+AGAR	3	6.54	6.52	6.48	5.95	6.31
70% - 10 s	PA	1	3.68	3.96	3.61	3.9	3.84
70% - 10 s	PA	2	4.27	4.06	4.09	4.28	4.05
70% - 10 s	PA	3	4.11	4.08	4.17	4.27	4.17
70% - 10 s	PA+PVA	1	5.13	5.3	5.41	5.07	5.31
70% - 10 s	PA+PVA	2	9.05	9.06	9.08	9.08	9.05
70% - 10 s	PA+PVA	3	4.5	4.09	4.21	4.43	4.21
70% - 10 s	PA+AGAR	1	3.55	3.56	3.5	3.36	3.62
70% - 10 s	PA+AGAR	2	3.65	3.82	3.92	4.09	3.82
70% - 10 s	PA+AGAR	3	3.1	3.31	2.74	3.09	2.82
Ablation Focus
Condition	Material	experimental focus point	simulation focus point
60% - 45 s	PA	12.68	15.59
60% - 45 s	PA+PVA	13.32	12.36
60% - 45 s	PA+AGAR	15.2	14.35
65% - 30 s	PA	12.34	15.63
65% - 30 s	PA+PVA	13.11	12.44
65% - 30 s	PA+AGAR	12.71	14.38
70% - 10 s	PA	10.62	15.83
70% - 10 s	PA+PVA	13.03	12.7
70% - 10 s	PA+AGAR	10.42	14.62
